# Supplementary material for: The Anti-Acne Potential and Chemical Composition of Knautia drymeia Heuff. and Knautia macedonica Griseb Extracts
Source: MDPI journal article supplement (doi:10.3390/ijms24119188), 2023-05-24
Supplement: s1 [file s1]

**Table S1.** High-resolution mass spectrometry (HR-MS) of [M-H]<sup>-</sup> ion and MS<sup>2</sup> data.

| Peak No. | Name of Compound                                                    | [M-H] <sup>-</sup> | MS <sup>2</sup>                  | Theoretical Mass [M-H] <sup>-</sup> (Da) | Experimental Mass [M-H] <sup>-</sup> (Da) | Δ mDa | Δ ppm | Elemental Composition                           |
|----------|---------------------------------------------------------------------|--------------------|----------------------------------|------------------------------------------|-------------------------------------------|-------|-------|-------------------------------------------------|
| 1        | Gallic acid                                                         | 169                | 69, 79, 81, 97, 124, 125b        | 169.01370                                | 169.01367                                 | -0.03 | 0.18  | C <sub>7</sub> H <sub>6</sub> O <sub>5</sub>    |
| 2        | Neochlorogenic acid                                                 | 353                | 135, 179, 191b                   | 353.08726                                | 353.08729                                 | 0.03  | 0.08  | C <sub>16</sub> H <sub>18</sub> O <sub>9</sub>  |
| 3        | Chlorogenic acid                                                    | 353                | 179, 191b                        | 353.08726                                | 353.08731                                 | 0.05  | 0.14  | C <sub>16</sub> H <sub>18</sub> O <sub>9</sub>  |
| 4        | <i>p</i> -Hydroxybenzoic acid                                       | 137                | 92, 93, 136, 137b                | 137.02387                                | 137.02391                                 | 0.04  | 0.29  | C <sub>7</sub> H <sub>6</sub> O <sub>3</sub>    |
| 5        | Cryptochlorogenic acid                                              | 353                | 135, 173b, 179, 191              | 353.08726                                | 353.08718                                 | -0.08 | 0.23  | C <sub>16</sub> H <sub>18</sub> O <sub>9</sub>  |
| 6        | Caffeic acid                                                        | 179                | 97, 107, 135b                    | 179.03444                                | 179.03440                                 | -0.04 | 0.22  | C <sub>9</sub> H <sub>8</sub> O <sub>4</sub>    |
| 7        | Syringic acid                                                       | 197                | 85, 121b, 138, 153, 181, 197     | 197.04500                                | 197.04507                                 | 0.07  | 0.36  | C <sub>9</sub> H <sub>10</sub> O <sub>5</sub>   |
| 8        | <i>p</i> -Coumaric acid                                             | 163                | 119, 162b                        | 163.03952                                | 163.03944                                 | -0.08 | 0.49  | C <sub>9</sub> H <sub>8</sub> O <sub>3</sub>    |
| 9        | <i>o</i> -Coumaric acid                                             | 163                | 119, 162b                        | 163.03952                                | 163.03957                                 | 0.05  | 0.31  | C <sub>9</sub> H <sub>8</sub> O <sub>3</sub>    |
| 10       | Ferulic acid                                                        | 193                | 73, 89b, 106, 117, 133, 134, 179 | 193.05009                                | 193.05012                                 | 0.03  | 0.16  | C <sub>10</sub> H <sub>10</sub> O <sub>4</sub>  |
| 11       | 3,5-Di- <i>O</i> -caffeoylquinic acid                               | 515                | 191, 335, 353b, 515              | 515.11896                                | 515.11891                                 | -0.05 | 0.10  | C <sub>25</sub> H <sub>24</sub> O <sub>12</sub> |
| 12       | Vanillic acid                                                       | 167                | 108, 123, 152, 167b              | 178.04774                                | 178.04769                                 | -0.05 | 0.28  | C <sub>8</sub> H <sub>8</sub> O <sub>4</sub>    |
| 13       | <i>m</i> -Hydroxybenzoic acid                                       | 137                | 92, 93, 136, 137b                | 137.02387                                | 137.02383                                 | -0.04 | 0.29  | C <sub>7</sub> H <sub>6</sub> O <sub>3</sub>    |
| 14       | Salicylic acid                                                      | 137                | 92, 93, 136, 137b                | 137.02387                                | 137.02381                                 | -0.06 | 0.44  | C <sub>7</sub> H <sub>6</sub> O <sub>3</sub>    |
| 15       | Kaempferol-3- <i>O</i> -rutinoside                                  | 593                | 85, 287b, 447                    | 593.15065                                | 593.15075                                 | 0.10  | 0.17  | C <sub>27</sub> H <sub>30</sub> O <sub>15</sub> |
| 16       | Rutin                                                               | 609                | 151, 179, 301b, 463, 609         | 609.18195                                | 609.18192                                 | -0.03 | 0.05  | C <sub>27</sub> H <sub>30</sub> O <sub>16</sub> |
| 17       | Luteolin-7- <i>O</i> -rutinoside                                    | 593                | 85, 287b, 447                    | 593.15065                                | 593.15069                                 | 0.04  | 0.07  | C <sub>27</sub> H <sub>30</sub> O <sub>15</sub> |
| 18       | Quercetin-3- <i>O</i> -β-D-(2''- <i>O</i> -β-D-xylosyl) galactoside | 595                | 151, 179, 301, 433b, 595         | 595.12992                                | 595.12999                                 | 0.07  | 0.12  | C <sub>26</sub> H <sub>28</sub> O <sub>16</sub> |
| 19       | Naringin                                                            | 579                | 145, 151, 271, 579b              | 579.17139                                | 579.17128                                 | -0.11 | 0.19  | C <sub>27</sub> H <sub>32</sub> O <sub>14</sub> |
| 20       | Rhoifolin                                                           | 577                | 269b, 577                        | 577.15574                                | 577.15577                                 | 0.03  | 0.05  | C <sub>27</sub> H <sub>30</sub> O <sub>14</sub> |
| 21       | Isorhoifolin                                                        | 577                | 269b, 577                        | 577.15574                                | 577.15570                                 | -0.04 | 0.07  | C <sub>27</sub> H <sub>30</sub> O <sub>14</sub> |
| 22       | Hyperoside                                                          | 463                | 151, 179, 255, 271, 301b         | 463.08766                                | 463.08769                                 | 0.03  | 0.06  | C <sub>21</sub> H <sub>20</sub> O <sub>12</sub> |

|    |                                     |     |                                        |           |           |       |      |                                                 |
|----|-------------------------------------|-----|----------------------------------------|-----------|-----------|-------|------|-------------------------------------------------|
| 23 | Isoquercitrin                       | 463 | 151, 179, 192, 301, 461, 463b          | 463.08766 | 463.08761 | -0.05 | 0.11 | C <sub>21</sub> H <sub>20</sub> O <sub>12</sub> |
| 24 | Quercitrin                          | 447 | 151, 243, 255, 271, 300b, 301, 447     | 447.09274 | 447.09279 | 0.05  | 0.11 | C <sub>21</sub> H <sub>20</sub> O <sub>11</sub> |
| 25 | Quercetin-3- <i>O</i> -glucuronide  | 477 | 151, 301b, 477                         | 477.06692 | 477.06687 | -0.05 | 0.10 | C <sub>21</sub> H <sub>18</sub> O <sub>13</sub> |
| 26 | Orientin                            | 447 | 285, 297, 327b, 357, 447               | 447.09274 | 447.09283 | 0.09  | 0.20 | C <sub>21</sub> H <sub>20</sub> O <sub>11</sub> |
| 27 | Homoorientin                        | 447 | 285, 297, 327b, 357, 447               | 447.09274 | 447.09261 | -0.13 | 0.29 | C <sub>21</sub> H <sub>20</sub> O <sub>11</sub> |
| 28 | Luteolin-7- <i>O</i> -glucuronide   | 461 | 216b, 285, 461                         | 461.07201 | 461.07208 | 0.07  | 0.15 | C <sub>21</sub> H <sub>18</sub> O <sub>12</sub> |
| 29 | Kaempferol-3- <i>O</i> -glucuronide | 461 | 113, 229, 285b, 461                    | 461.07201 | 461.07215 | 0.14  | 0.30 | C <sub>21</sub> H <sub>18</sub> O <sub>12</sub> |
| 30 | Apigenin-7- <i>O</i> -glucuronide   | 445 | 117, 149, 151, 225, 269b               | 445.07709 | 445.07703 | -0.06 | 0.13 | C <sub>21</sub> H <sub>18</sub> O <sub>11</sub> |
| 31 | Luteolin-7- <i>O</i> -glucoside     | 447 | 133, 151, 175, 199, 287b, 447          | 447.09274 | 447.09263 | -0.11 | 0.25 | C <sub>21</sub> H <sub>20</sub> O <sub>11</sub> |
| 32 | Kaempferol-7- <i>O</i> -glucoside   | 447 | 257, 285b, 447                         | 447.09274 | 447.09278 | 0.04  | 0.09 | C <sub>21</sub> H <sub>20</sub> O <sub>11</sub> |
| 33 | Kaempferol-3- <i>O</i> -glucoside   | 447 | 257, 285b, 447                         | 447.09274 | 447.09287 | 0.13  | 0.29 | C <sub>21</sub> H <sub>20</sub> O <sub>11</sub> |
| 34 | Isovitexin                          | 431 | 283, 311b, 323, 341                    | 431.09783 | 431.09780 | -0.03 | 0.07 | C <sub>21</sub> H <sub>20</sub> O <sub>10</sub> |
| 35 | Vitexin                             | 431 | 283, 311b, 323, 341                    | 431.09783 | 431.09794 | 0.11  | 0.26 | C <sub>21</sub> H <sub>20</sub> O <sub>10</sub> |
| 36 | Apigetrin                           | 431 | 117, 149, 151, 225, 269b, 431          | 431.09783 | 431.09797 | 0.14  | 0.32 | C <sub>21</sub> H <sub>20</sub> O <sub>10</sub> |
| 37 | Myricetin                           | 317 | 107, 109, 137, 151, 179, 317b          | 317.02975 | 317.02974 | -0.01 | 0.03 | C <sub>15</sub> H <sub>10</sub> O <sub>8</sub>  |
| 38 | Rosmarinic acid                     | 359 | 73, 123, 133, 135, 161b, 179, 197, 359 | 359.0767  | 359.07675 | 0.05  | 0.14 | C <sub>18</sub> H <sub>16</sub> O <sub>8</sub>  |
| 39 | Sinapic acid                        | 223 | 59, 141, 148, 164b, 178, 208, 223      | 223.06065 | 223.06069 | 0.04  | 0.18 | C <sub>11</sub> H <sub>12</sub> O <sub>5</sub>  |
| 40 | Quercetin                           | 301 | 151, 179b, 192, 209                    | 301.03483 | 301.03487 | 0.04  | 0.13 | C <sub>15</sub> H <sub>10</sub> O <sub>7</sub>  |
| 41 | Kaempferol                          | 285 | 93, 97, 119b, 164, 285                 | 285.03992 | 285.03983 | -0.09 | 0.32 | C <sub>15</sub> H <sub>10</sub> O <sub>6</sub>  |
| 42 | Luteolin                            | 285 | 133, 151, 175, 199, 285b               | 285.03992 | 285.03982 | -0.10 | 0.35 | C <sub>15</sub> H <sub>10</sub> O <sub>6</sub>  |
| 43 | Apigenin                            | 269 | 117, 149, 151, 225, 269b               | 269.04500 | 269.04502 | 0.02  | 0.07 | C <sub>15</sub> H <sub>10</sub> O <sub>5</sub>  |
| 44 | Naringenin                          | 271 | 107, 119, 151b, 177, 271               | 271.06065 | 271.06077 | 0.12  | 0.44 | C <sub>15</sub> H <sub>12</sub> O <sub>5</sub>  |
| 45 | Galangin                            | 269 | 223, 227, 269b                         | 269.04500 | 269.04505 | 0.05  | 0.19 | C <sub>15</sub> H <sub>10</sub> O <sub>5</sub>  |
| 46 | Chrysin                             | 253 | 101, 127, 145, 151b, 253b              | 253.05009 | 253.05012 | 0.03  | 0.12 | C <sub>15</sub> H <sub>10</sub> O <sub>4</sub>  |
| 47 | Pinocembrin                         | 255 | 101, 129, 151b, 255                    | 255.06574 | 255.06579 | 0.05  | 0.20 | C <sub>15</sub> H <sub>12</sub> O <sub>4</sub>  |

b – base peak

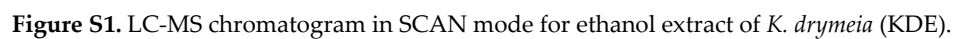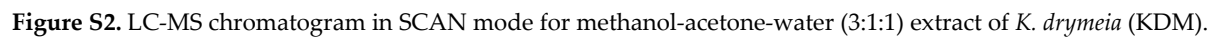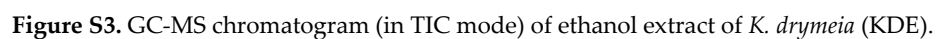

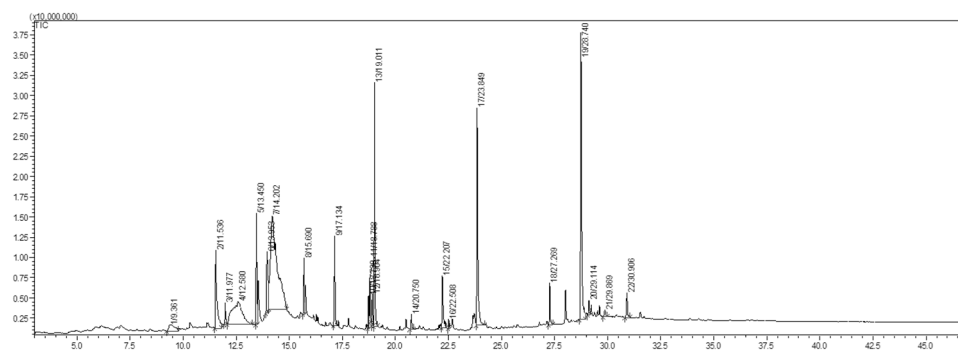

**Figure S4.** GC-MS chromatogram (in TIC mode) of ethanol extract of *K. macedonica* (KME).
